# Supplementary material
Source: publisher figshare collection journal article supplement (https://tandf.figshare.com/articles/dataset/_/985578)

CSIR-INDIAN INSTITUTE OF CHEMICAL TECHNOLOGY  
NATIONAL CENTRE FOR MASS SPECTROMETRY

Acq. Data Name: R9  
Creation Parameters: Average(MS[1] Time:1.38..1.41)  
Comment: N. Yamini, Gokaraju Rangaraju Coll. of Pharmacy, R9, EIMS

Experiment Date/Time: 06-06-2013 12:42:16  
Ionization Mode: EI+

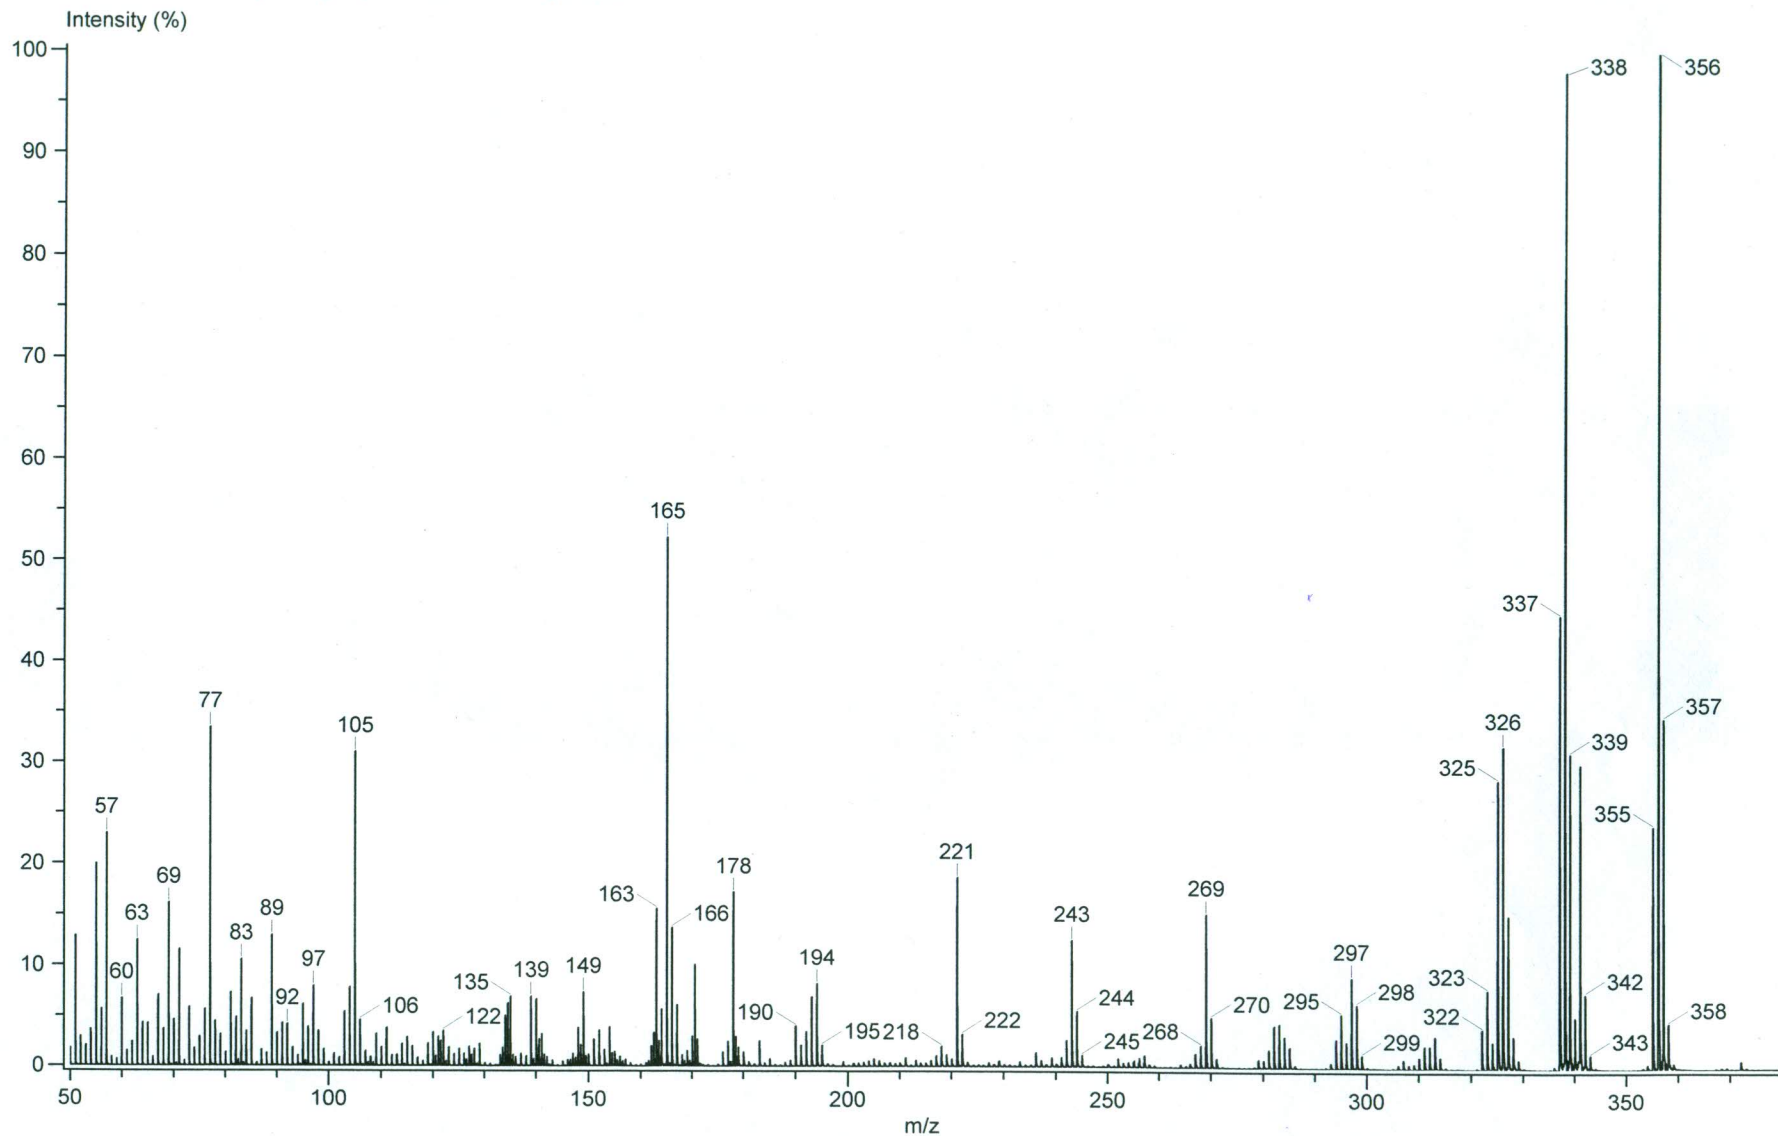

Supplement: Supplementary file 3 [file 3]
