# Supplementary material
Source: publisher figshare collection journal article supplement (https://tandf.figshare.com/articles/dataset/_/985578)

CSIR-INDIAN INSTITUTE OF CHEMICAL TECHNOLOGY  
NATIONAL CENTRE FOR MASS SPECTROMETRY

Experiment Date/Time: 04-06-2013 17:34:28  
Ionization Mode: EI+

Acq. Data Name: R2  
Creation Parameters: Average(MS1) Time:5.88,.6.04  
Comment: GOKARAJU RANGARAJU COP, N YAMINI, R2-EIMS

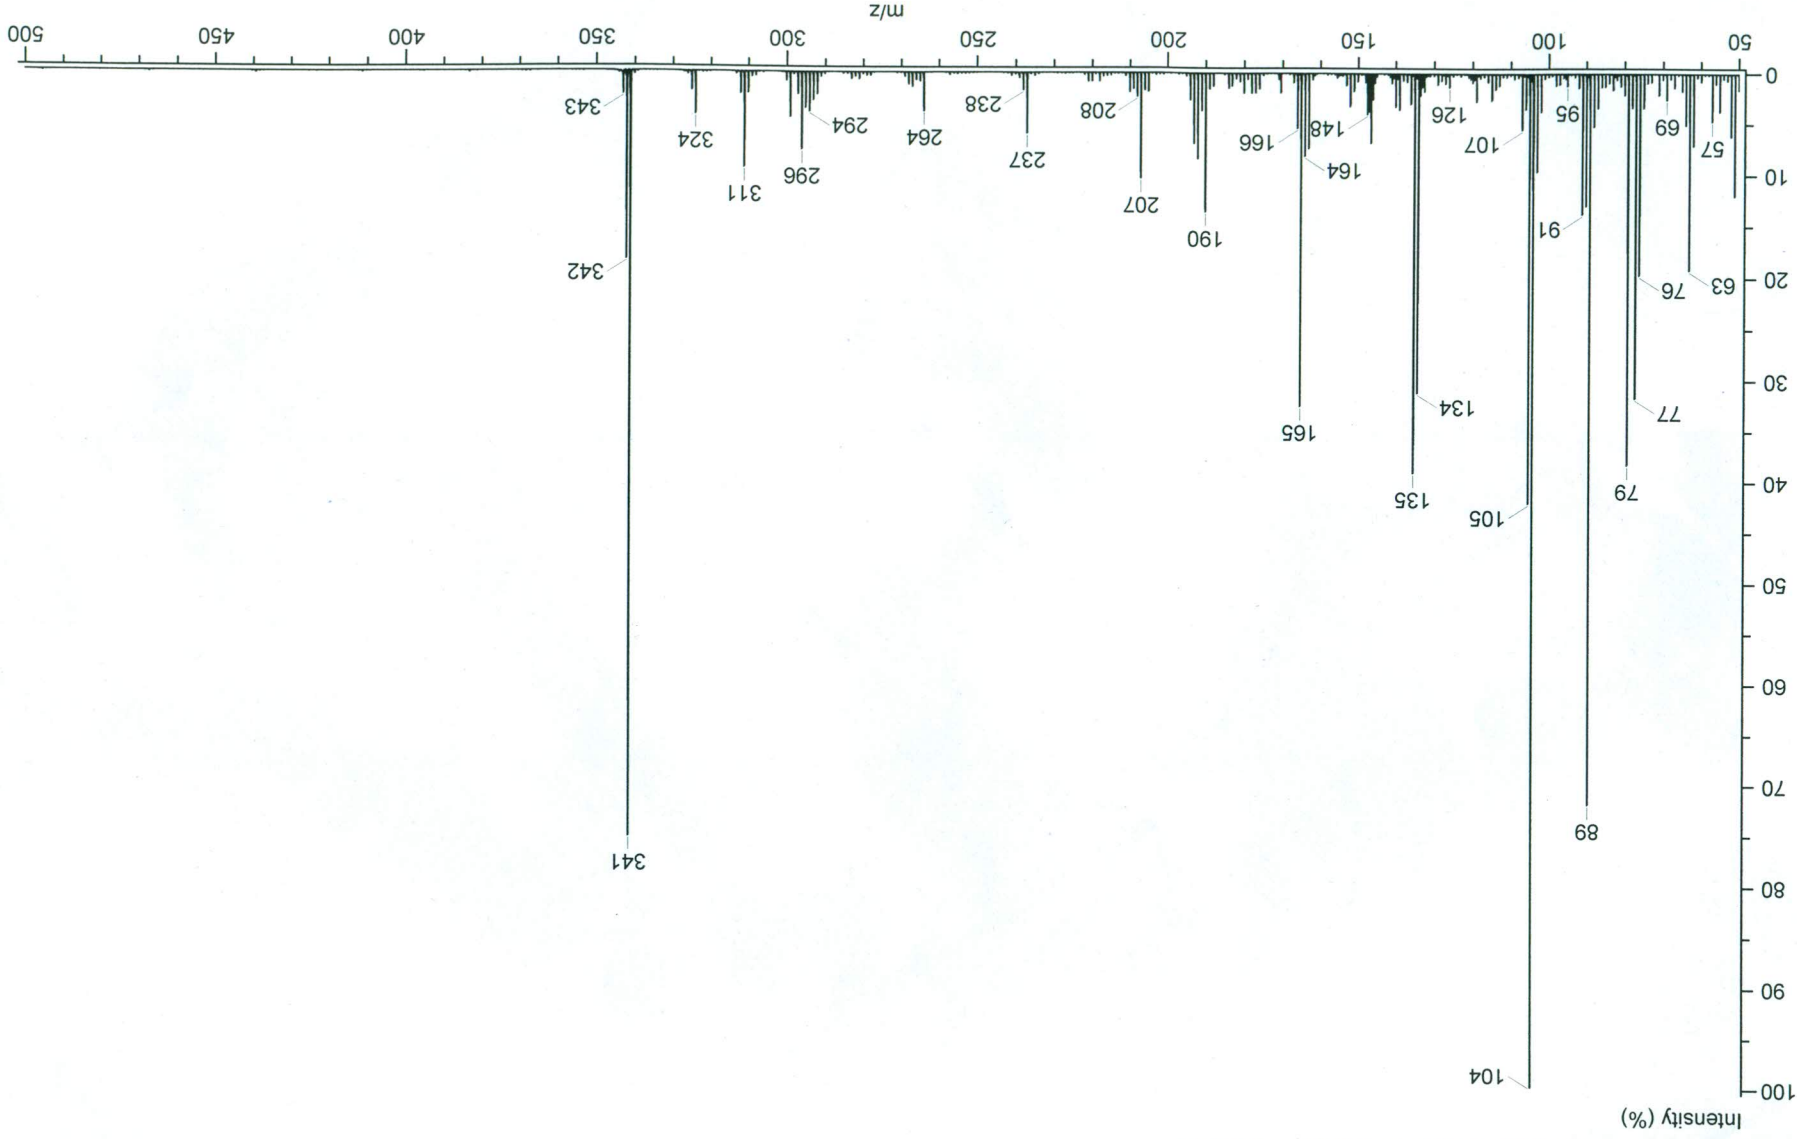

Supplement: Supplementary file 10 [file 3]
