# Supplementary material
Source: publisher figshare collection journal article supplement (https://tandf.figshare.com/articles/dataset/_/985578)

R.NO. 22849  
R-2  
1H IN DMSO  
AVANCE-300

*Hot*

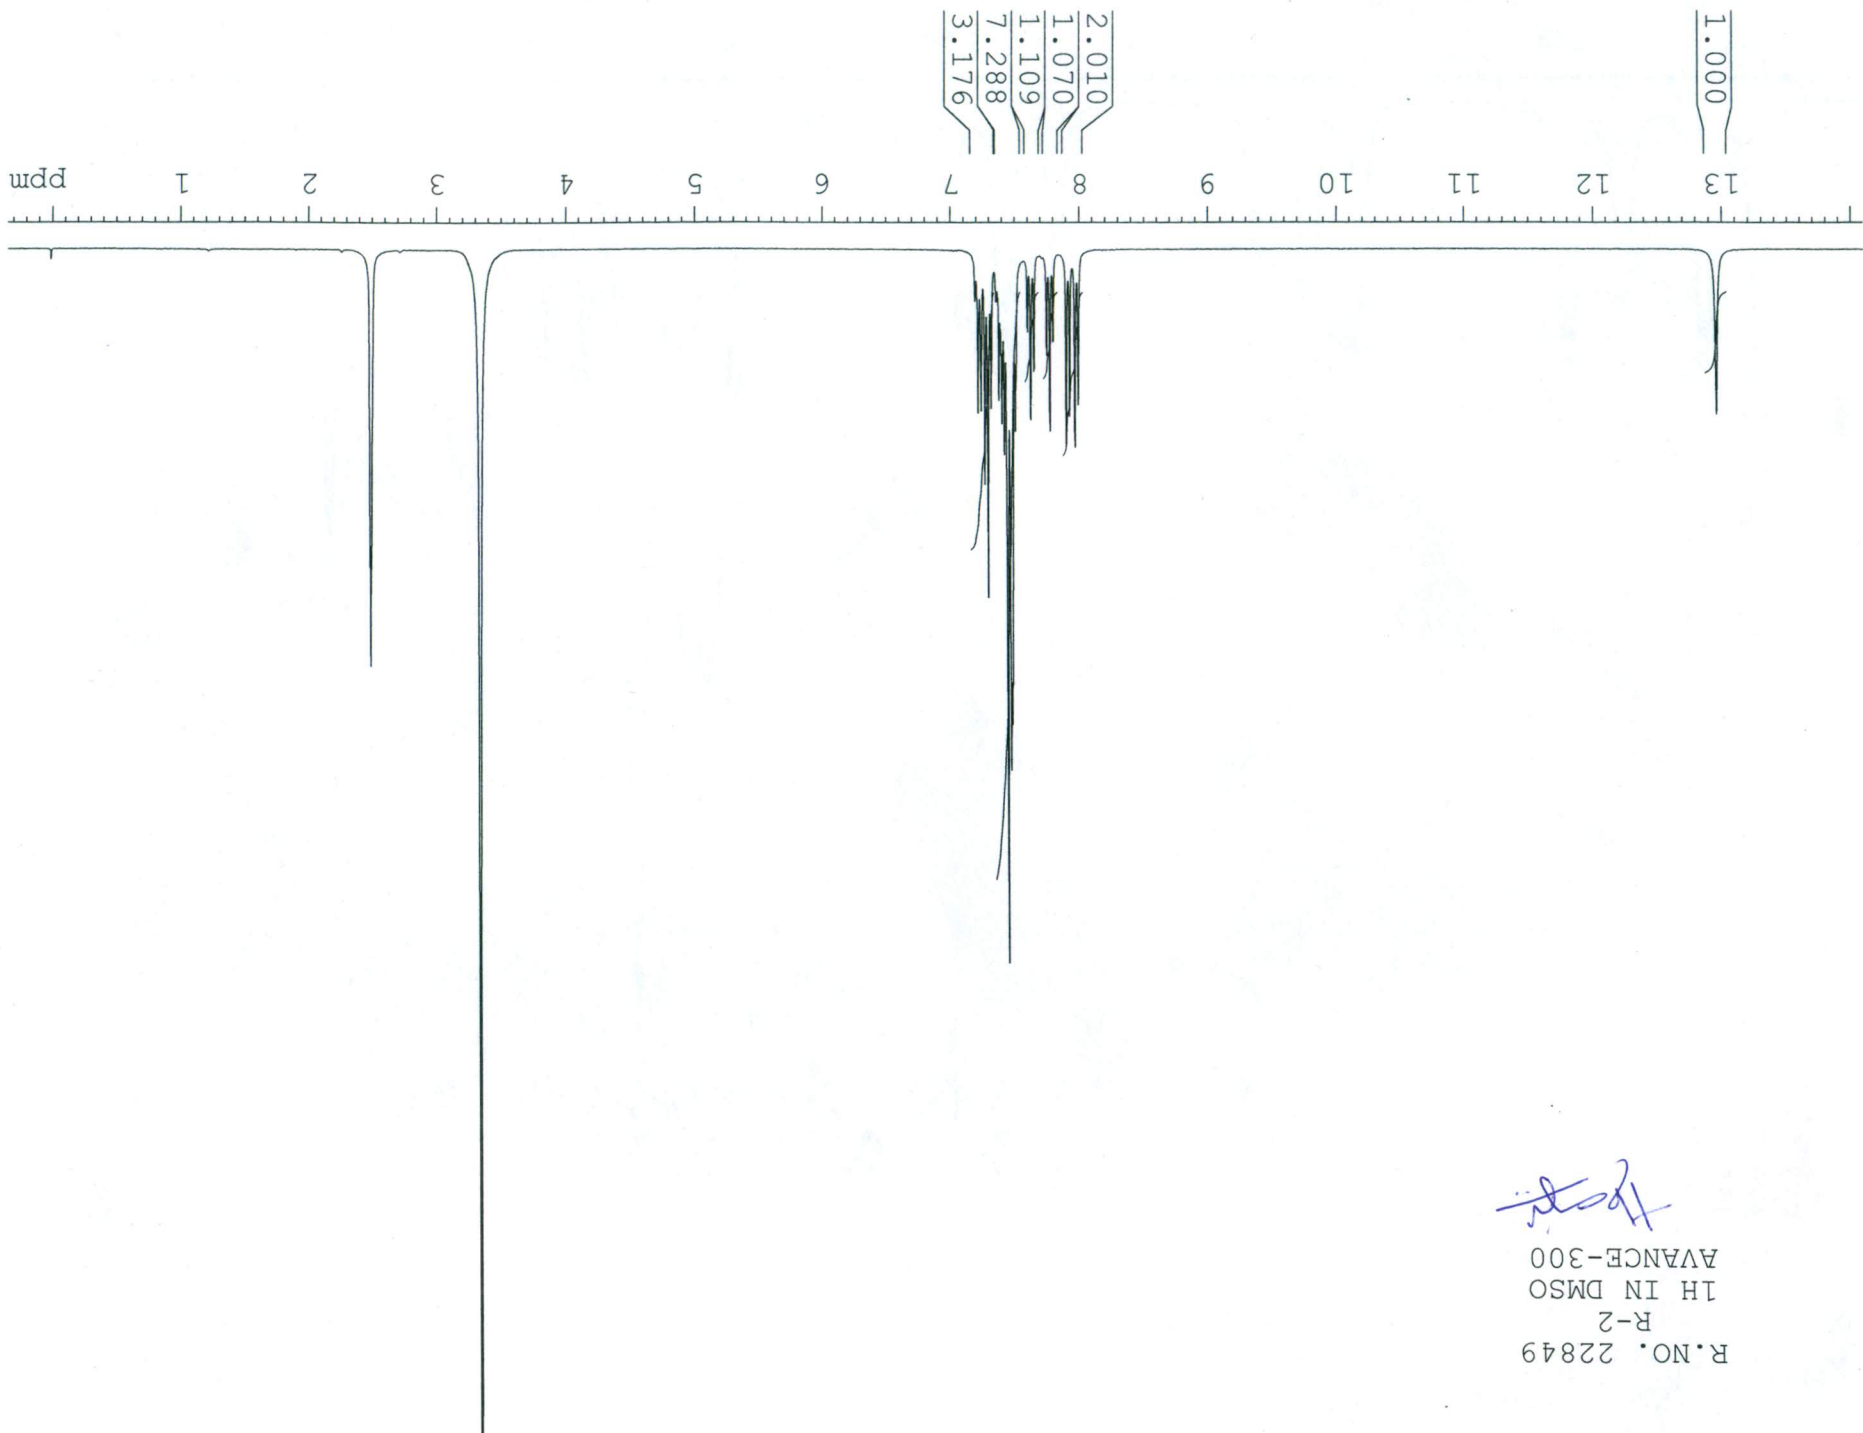

Supplement: Supplementary file 1 [file 3]

R.NO-23102  
R11  
13C IN DMSO  
AVANCE-300

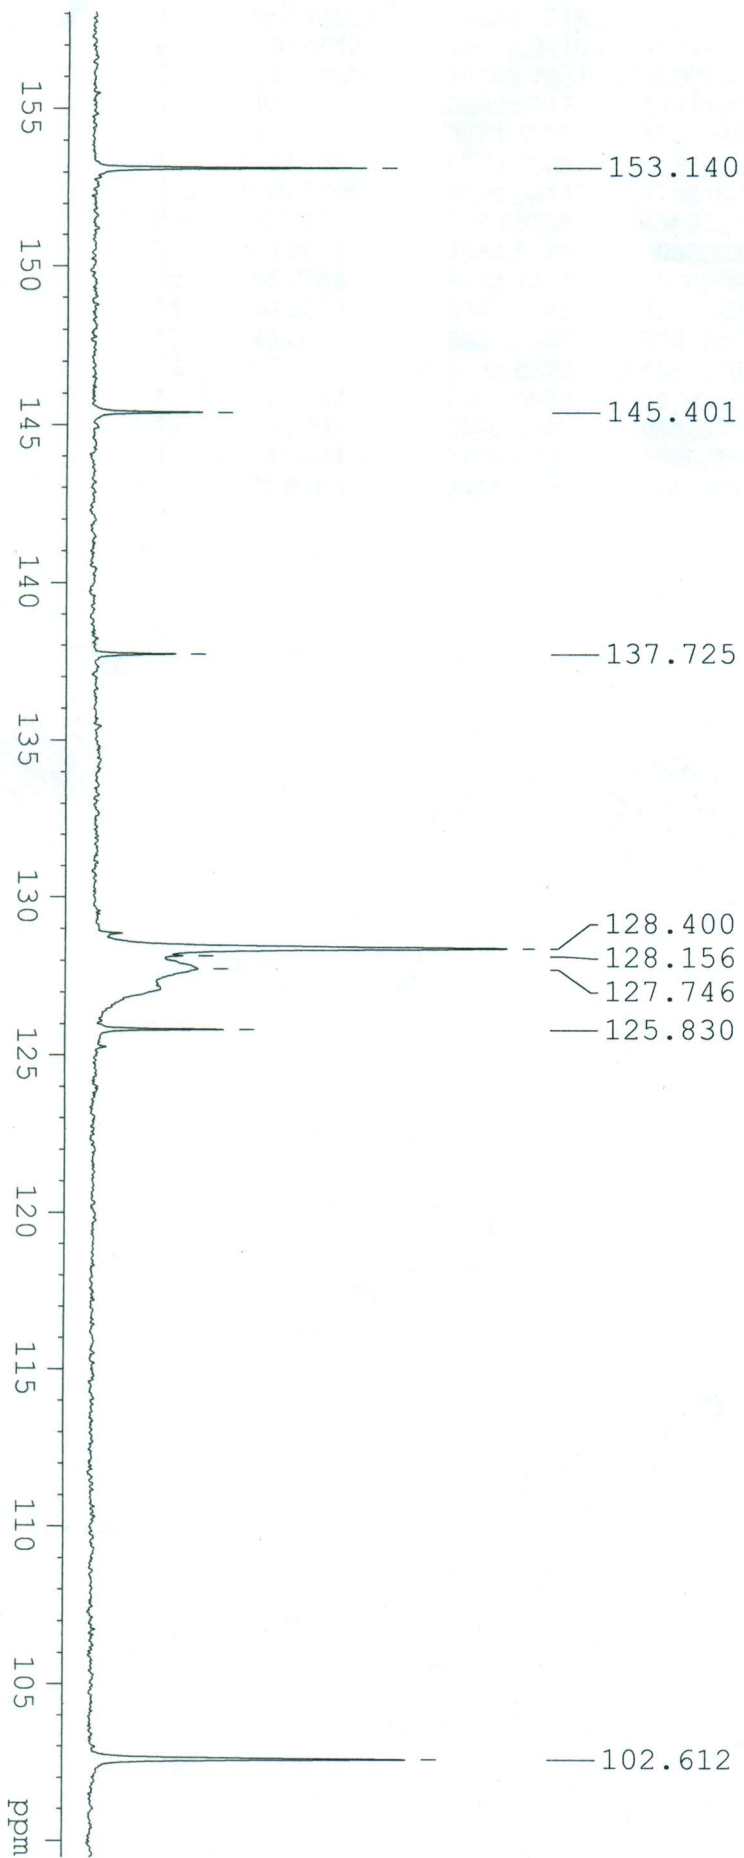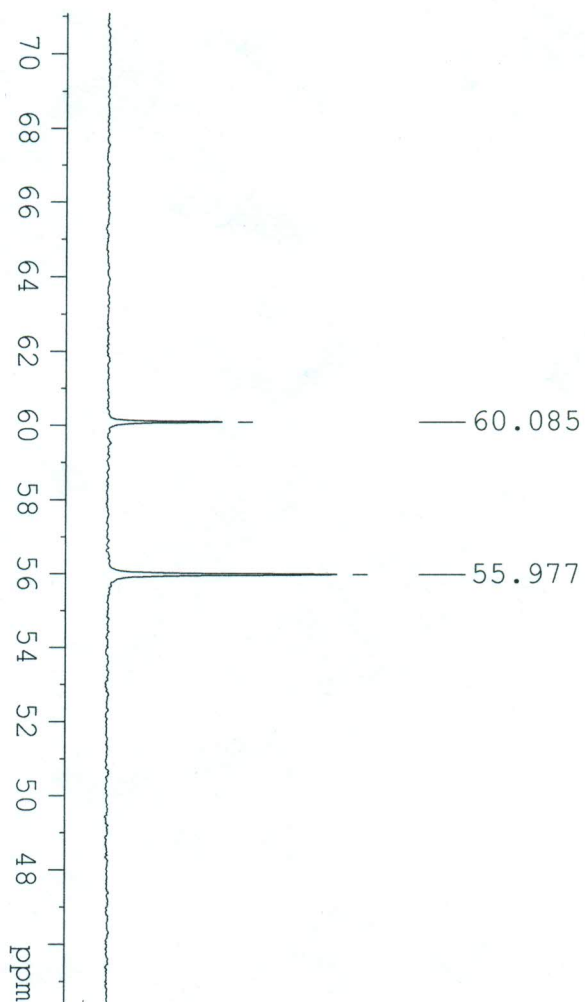

Supplement: Supplementary file 2 [file 3]

R.NO. 22849  
R-9  
1H IN CDCL3  
AVANCE-300

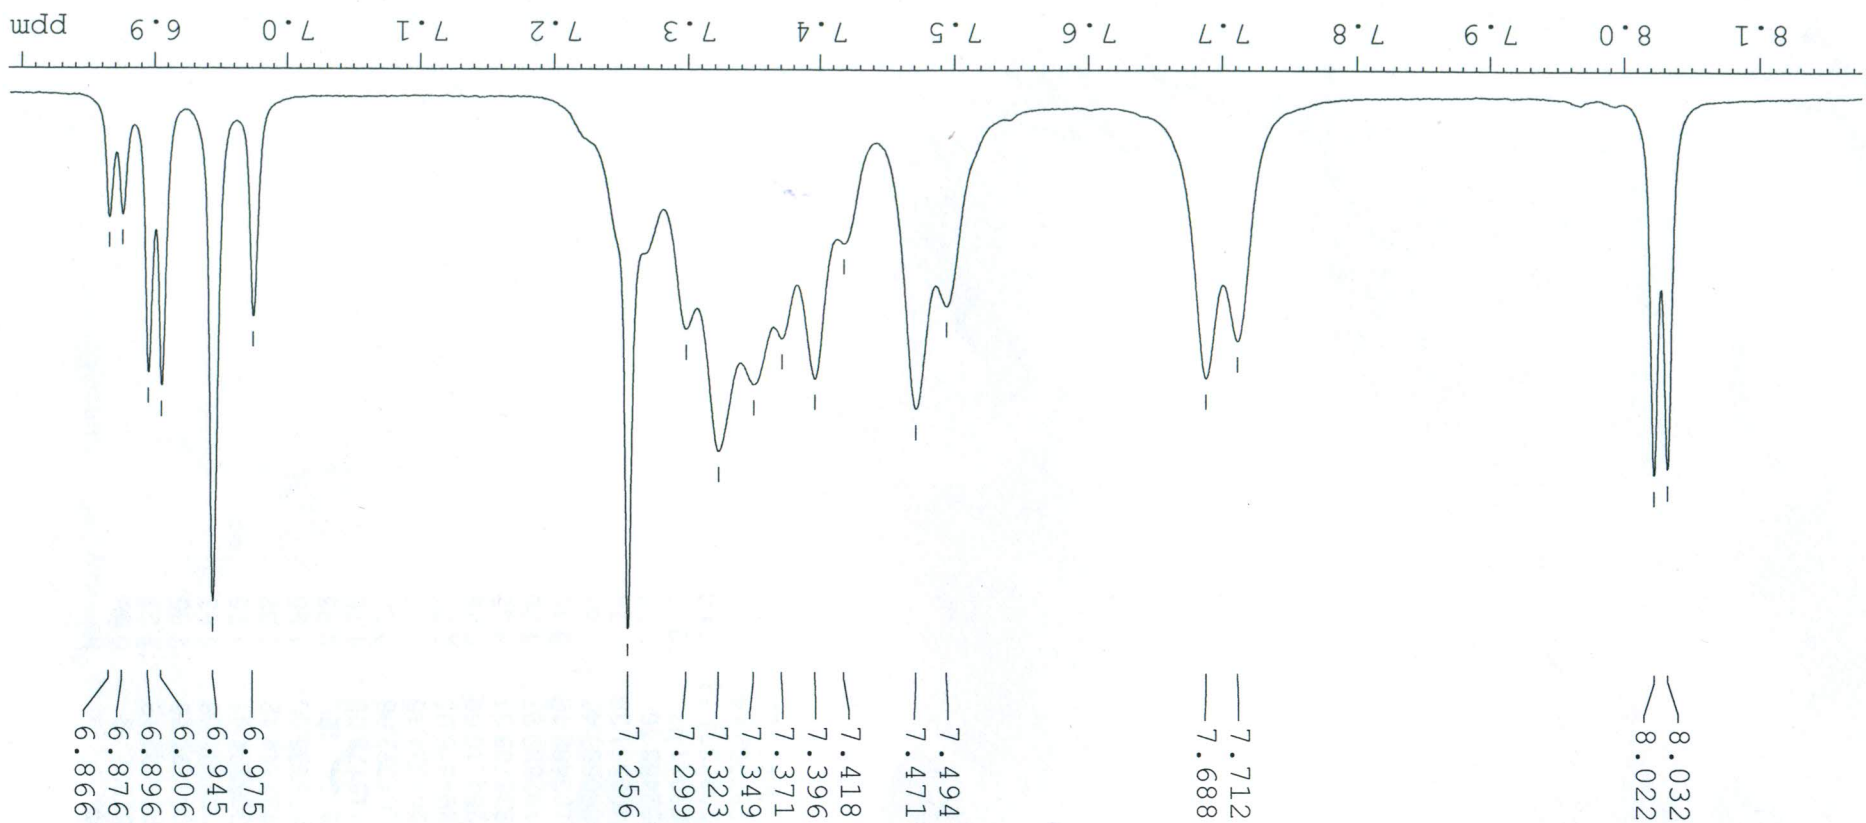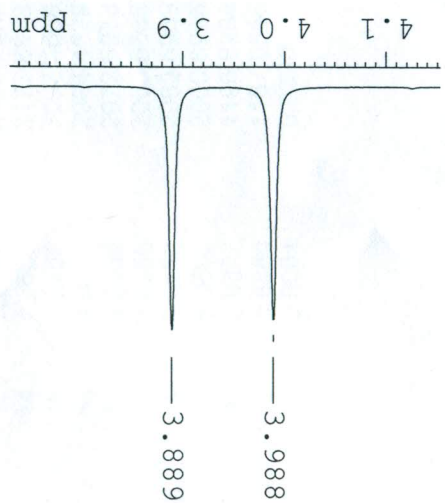

Supplement: Supplementary file 4 [file 3]

R.NO. 22853  
R-II  
1H IN DMSO  
AVANCE-300  
*Xy*

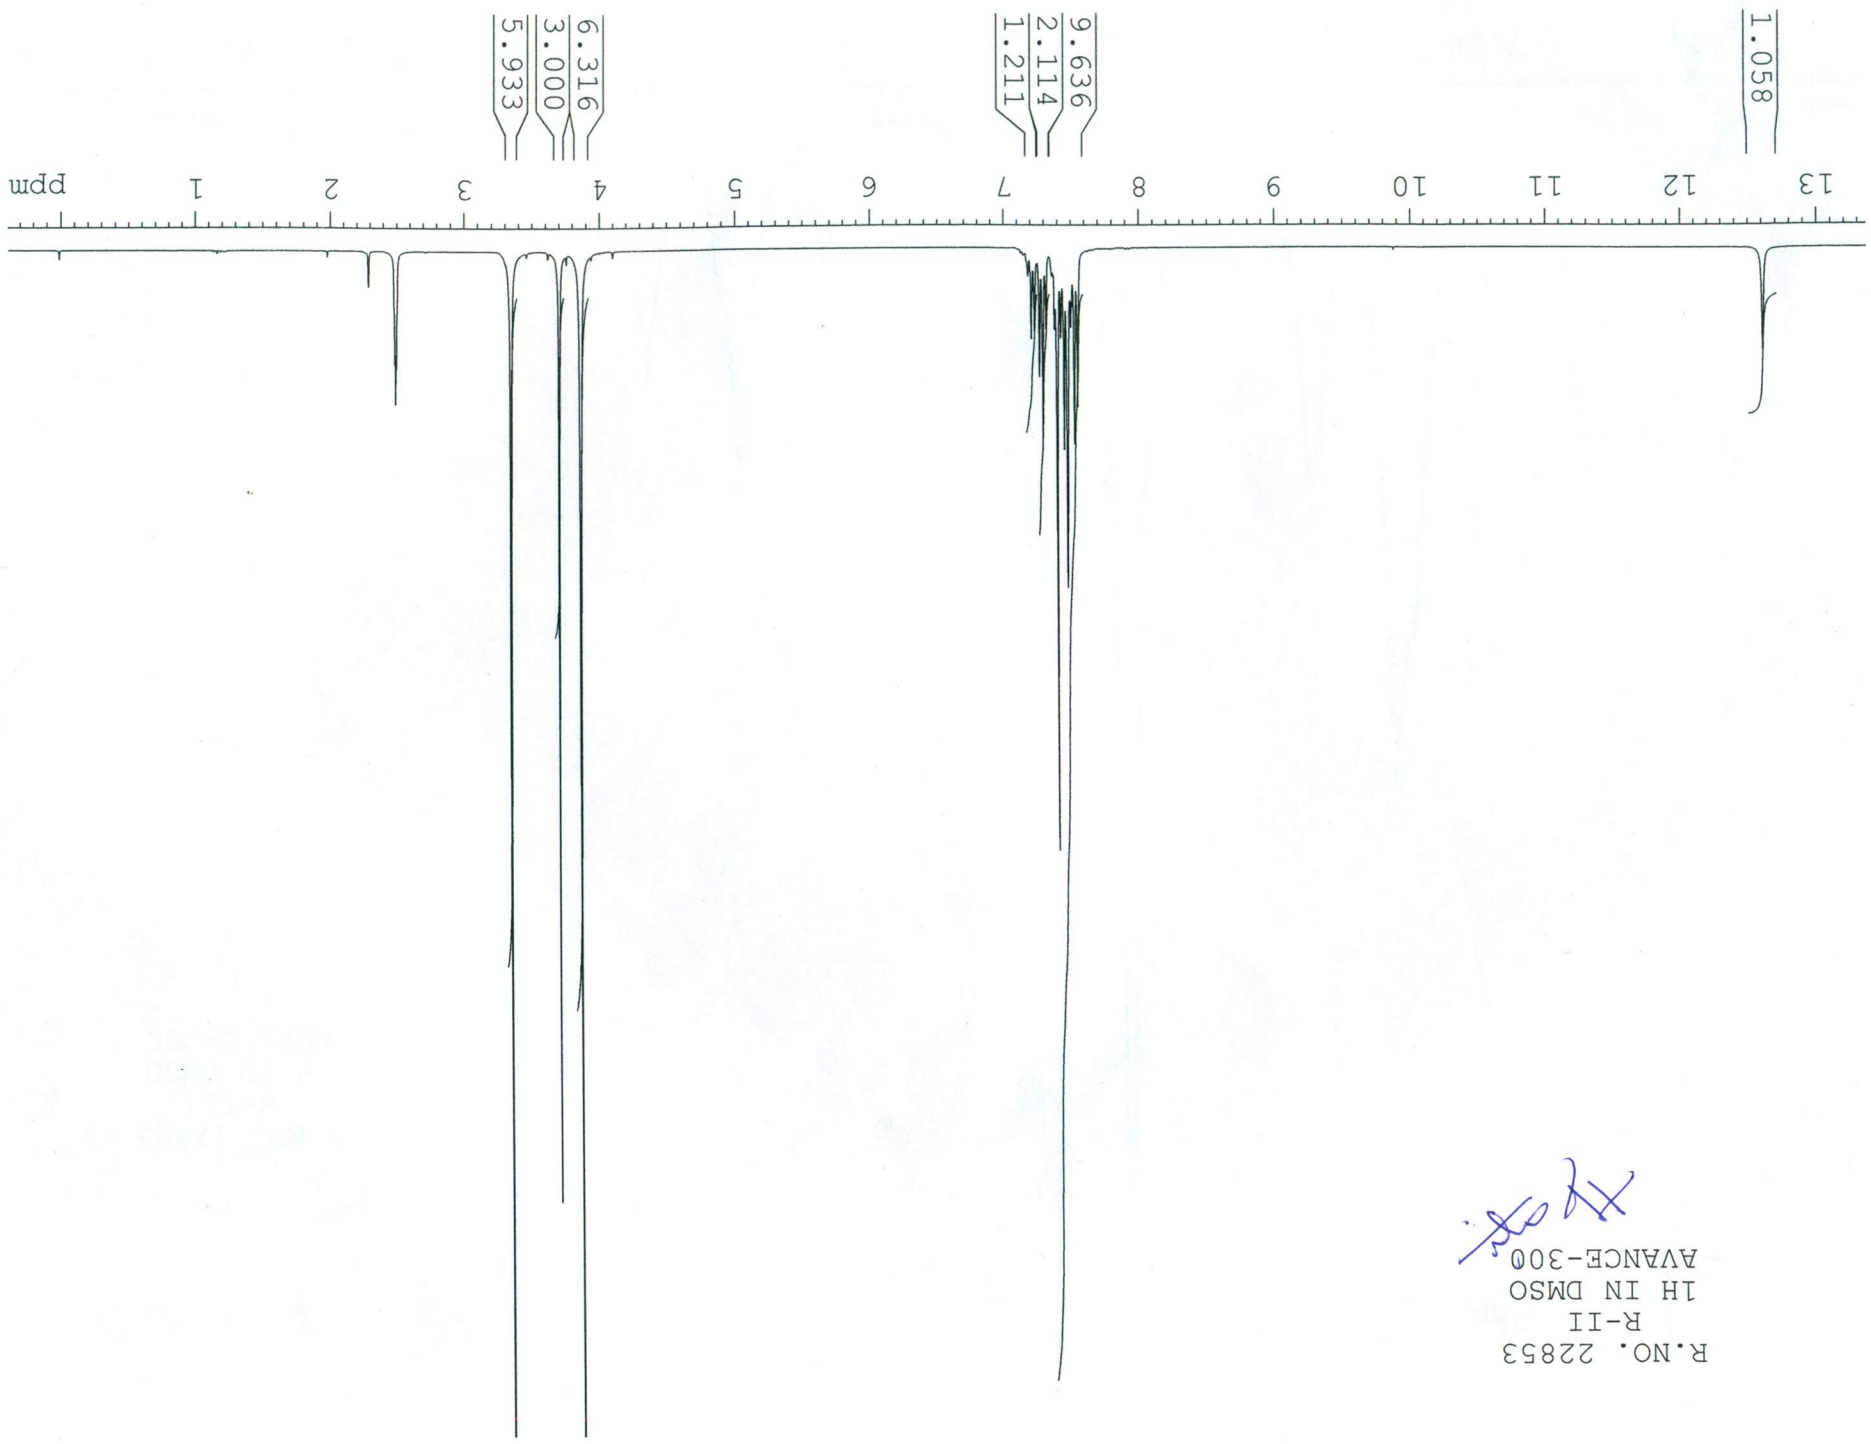

Supplement: Supplementary file 5 [file 3]

7.55 7.50 7.45 7.40 7.35 7.30 7.25 7.20 7.15 ppm

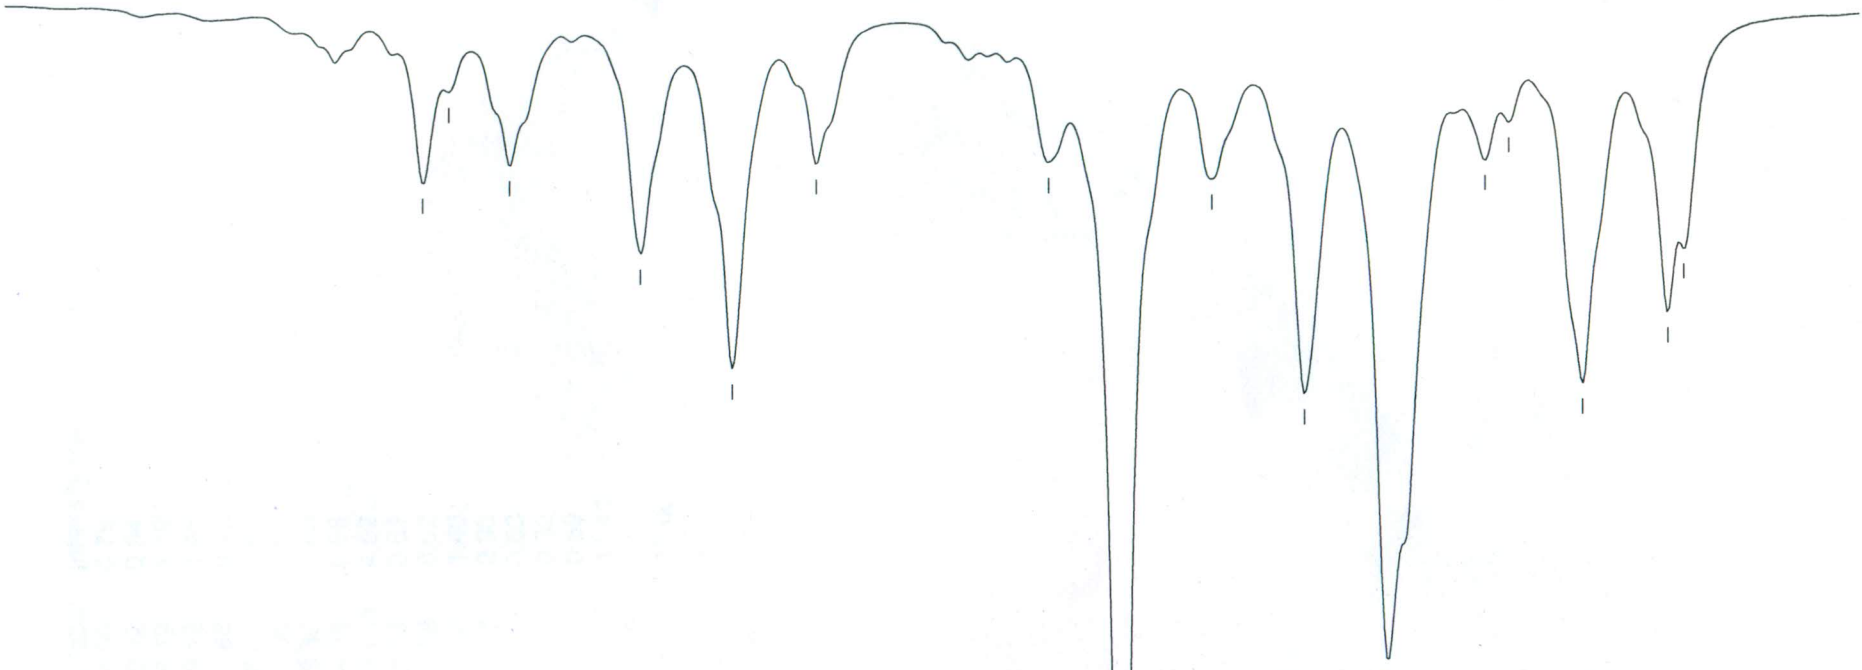

R.NO. 22853  
R-II  
1H IN DMSO  
AVANCE-300

7.556  
7.551  
7.528  
7.508  
7.501  
7.474  
7.451  
7.426  
7.400  
7.381  
7.317  
7.293  
7.268  
7.231  
7.214  
7.207

Supplement: Supplementary file 6 [file 3]

R.NO-23102  
R11  
13C IN DMSO  
AVANCE-300

*Handwritten signature*

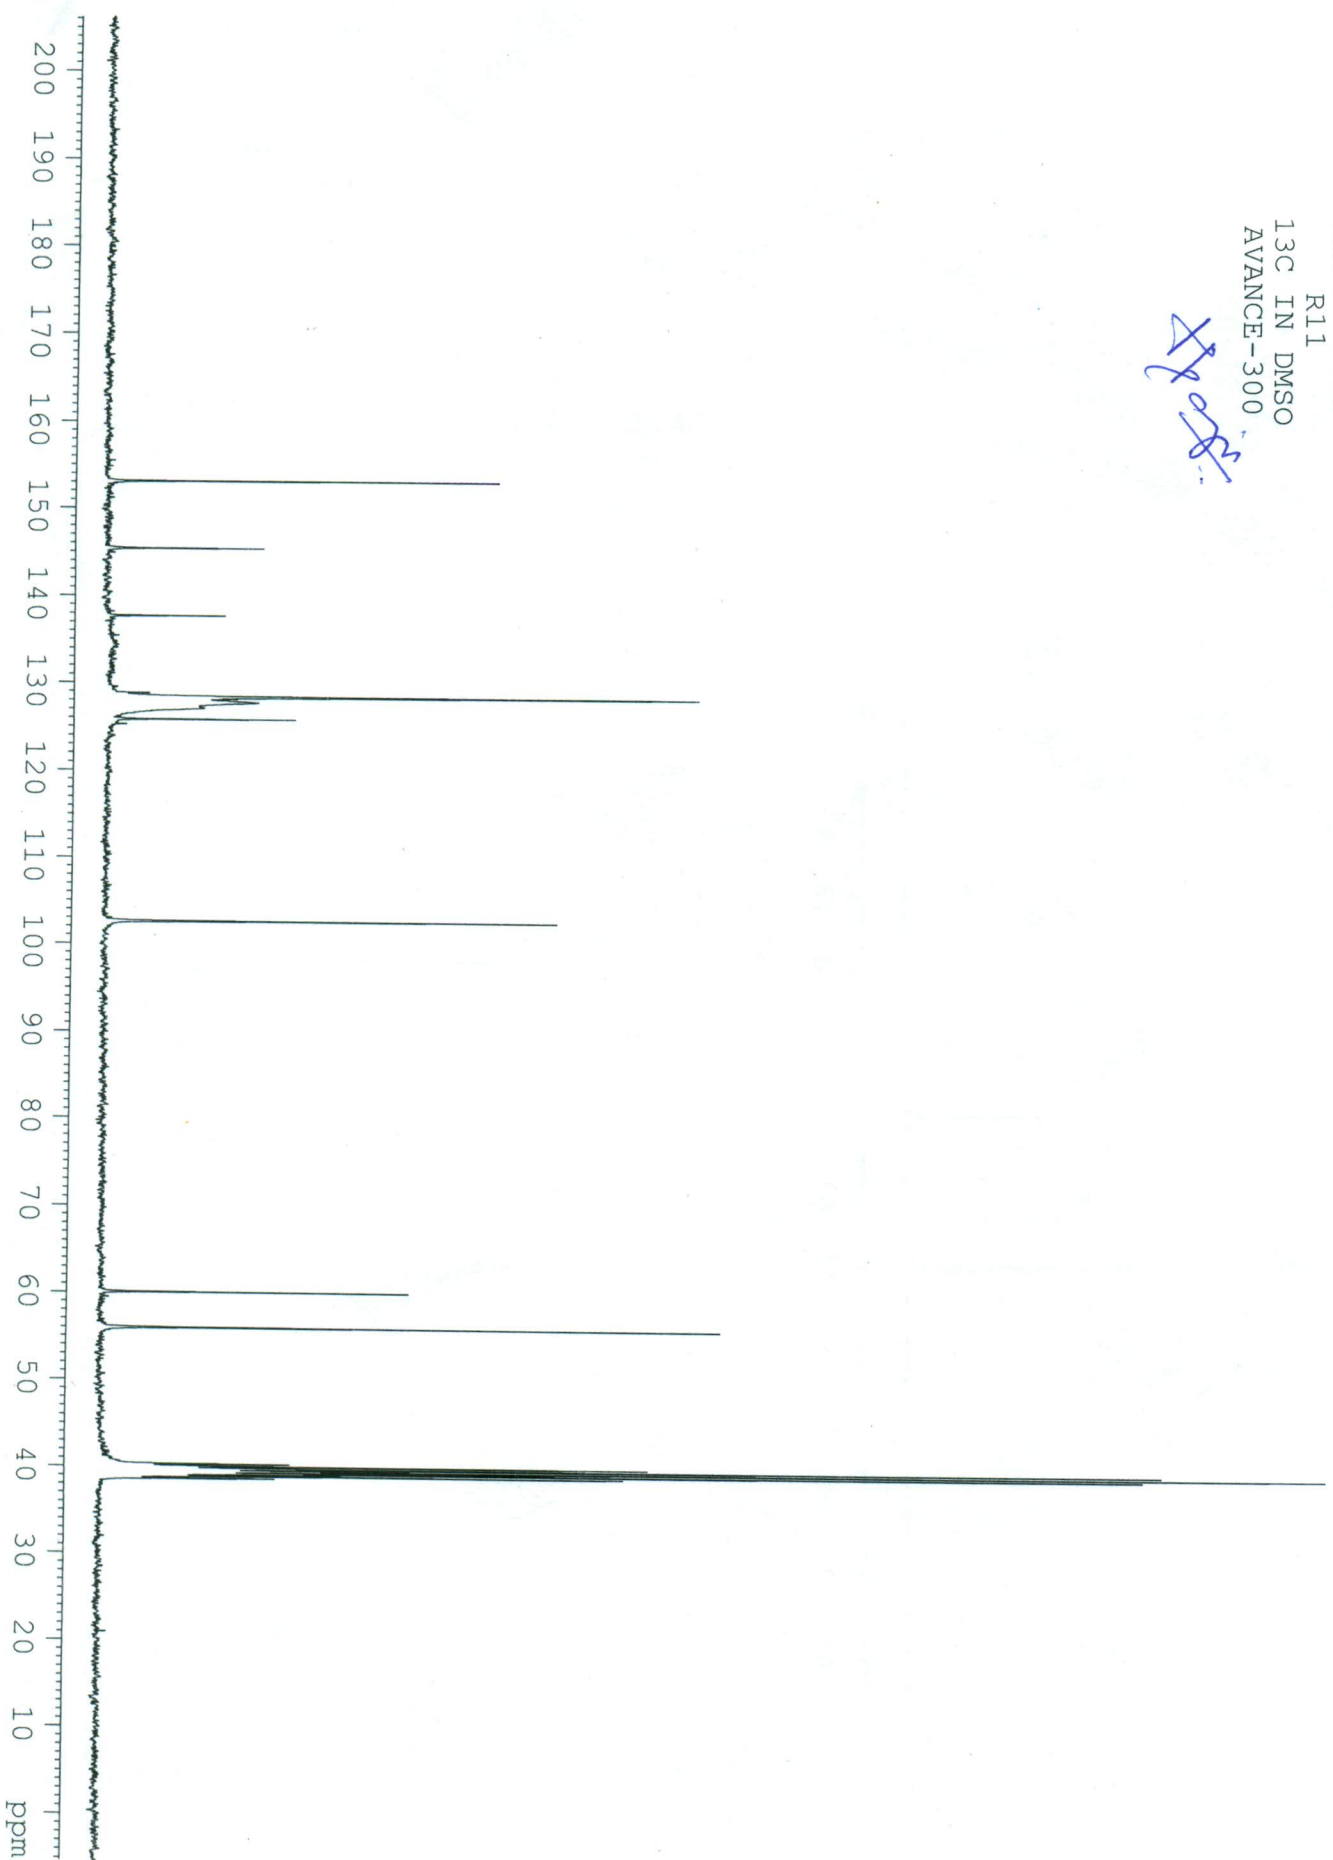

Supplement: Supplementary file 7 [file 3]

R.NO. 22849  
R-9  
1H IN CDCL3  
AVANCE-300

*Handwritten signature*

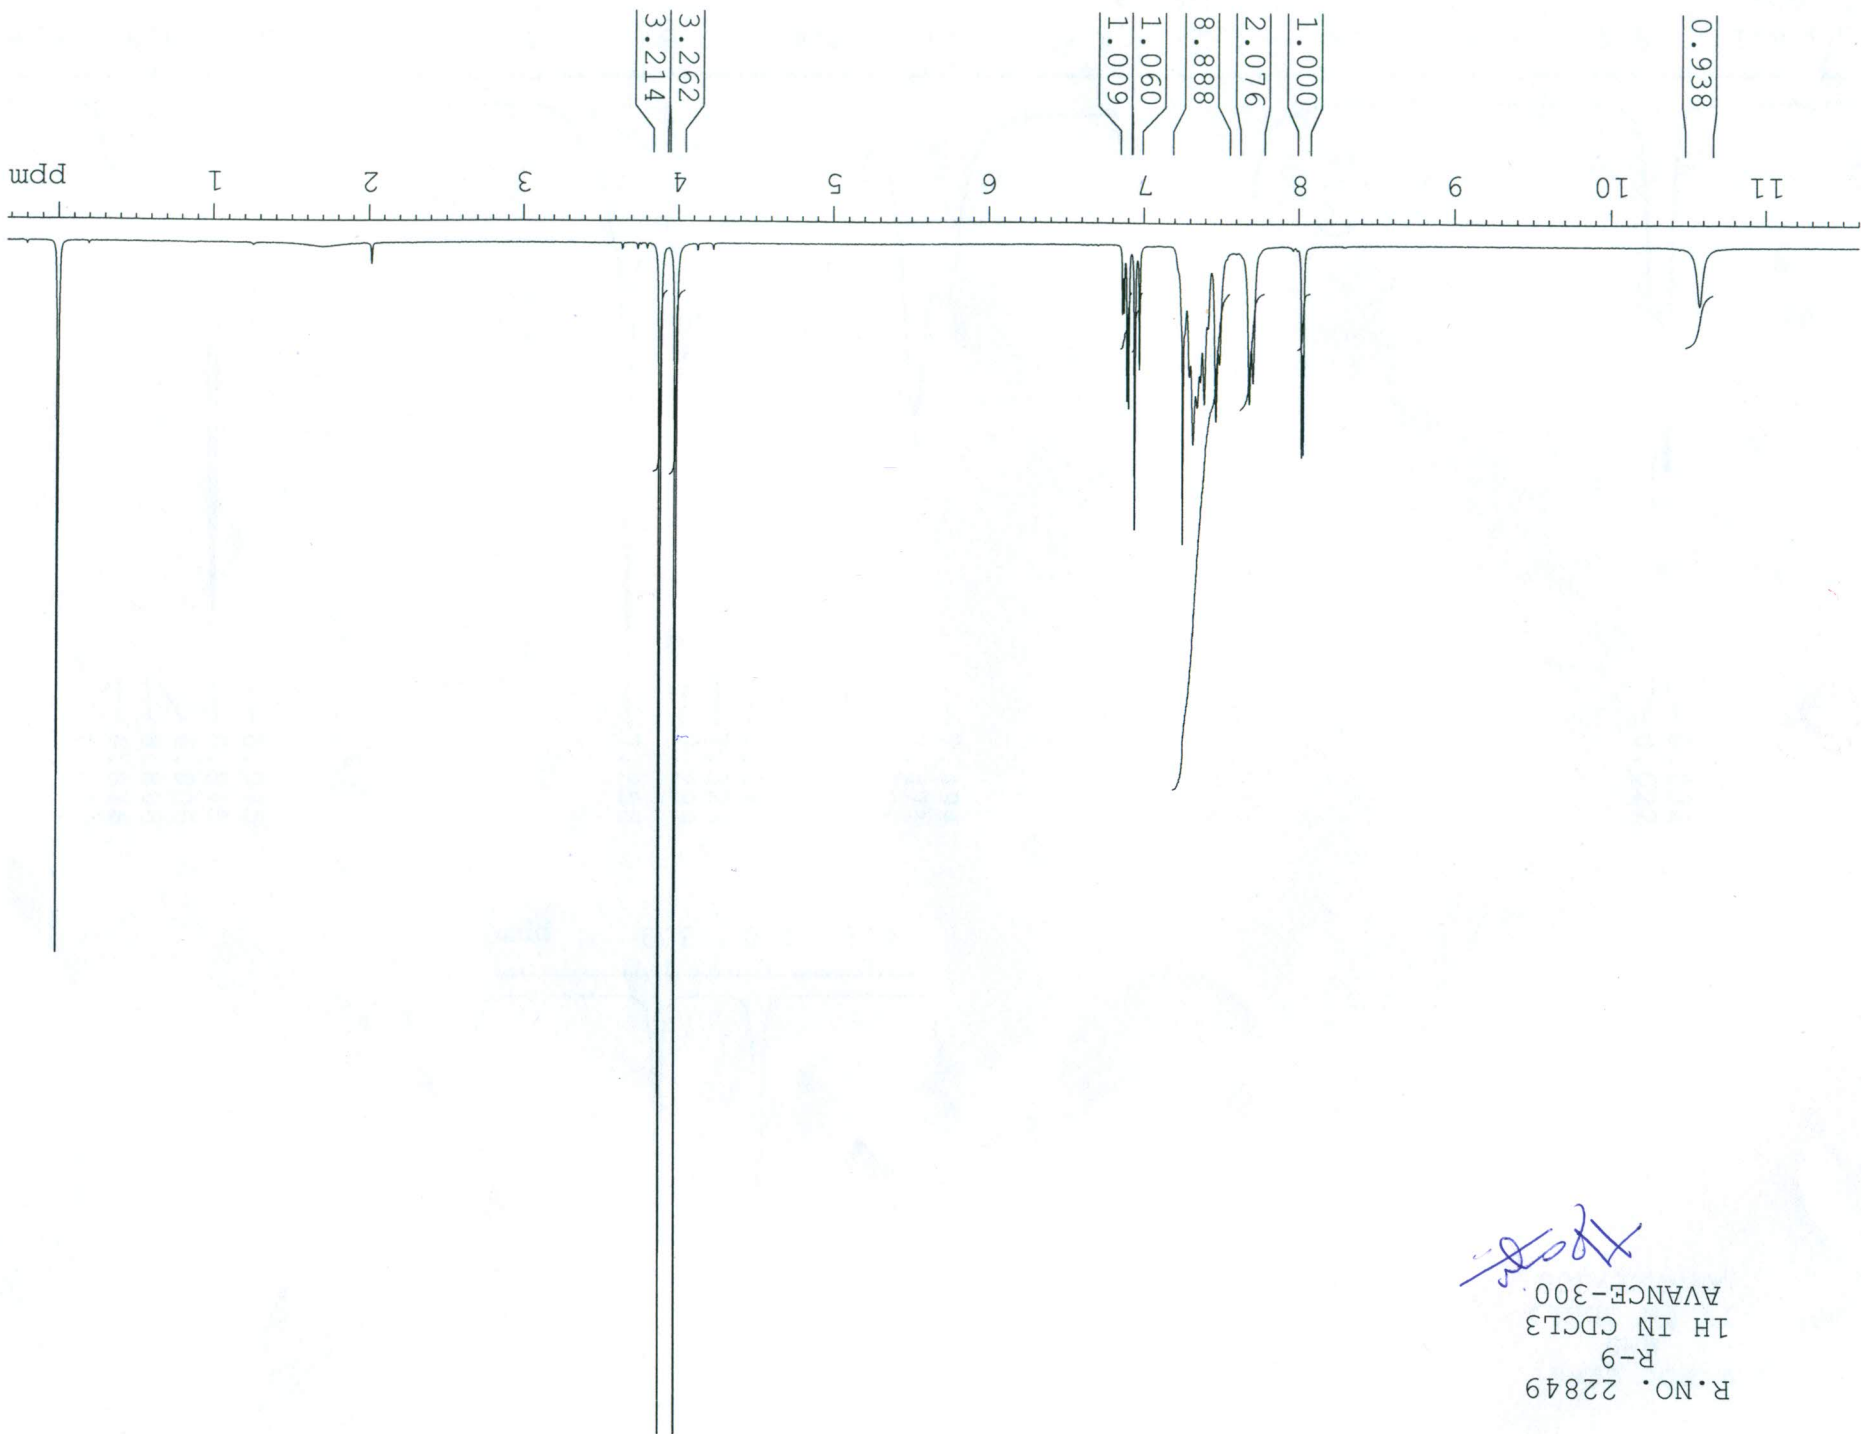

Supplement: Supplementary file 8 [file 3]

R.NO-23102  
R<sub>9</sub>  
13C IN CDCL<sub>3</sub>  
AVANCE-300

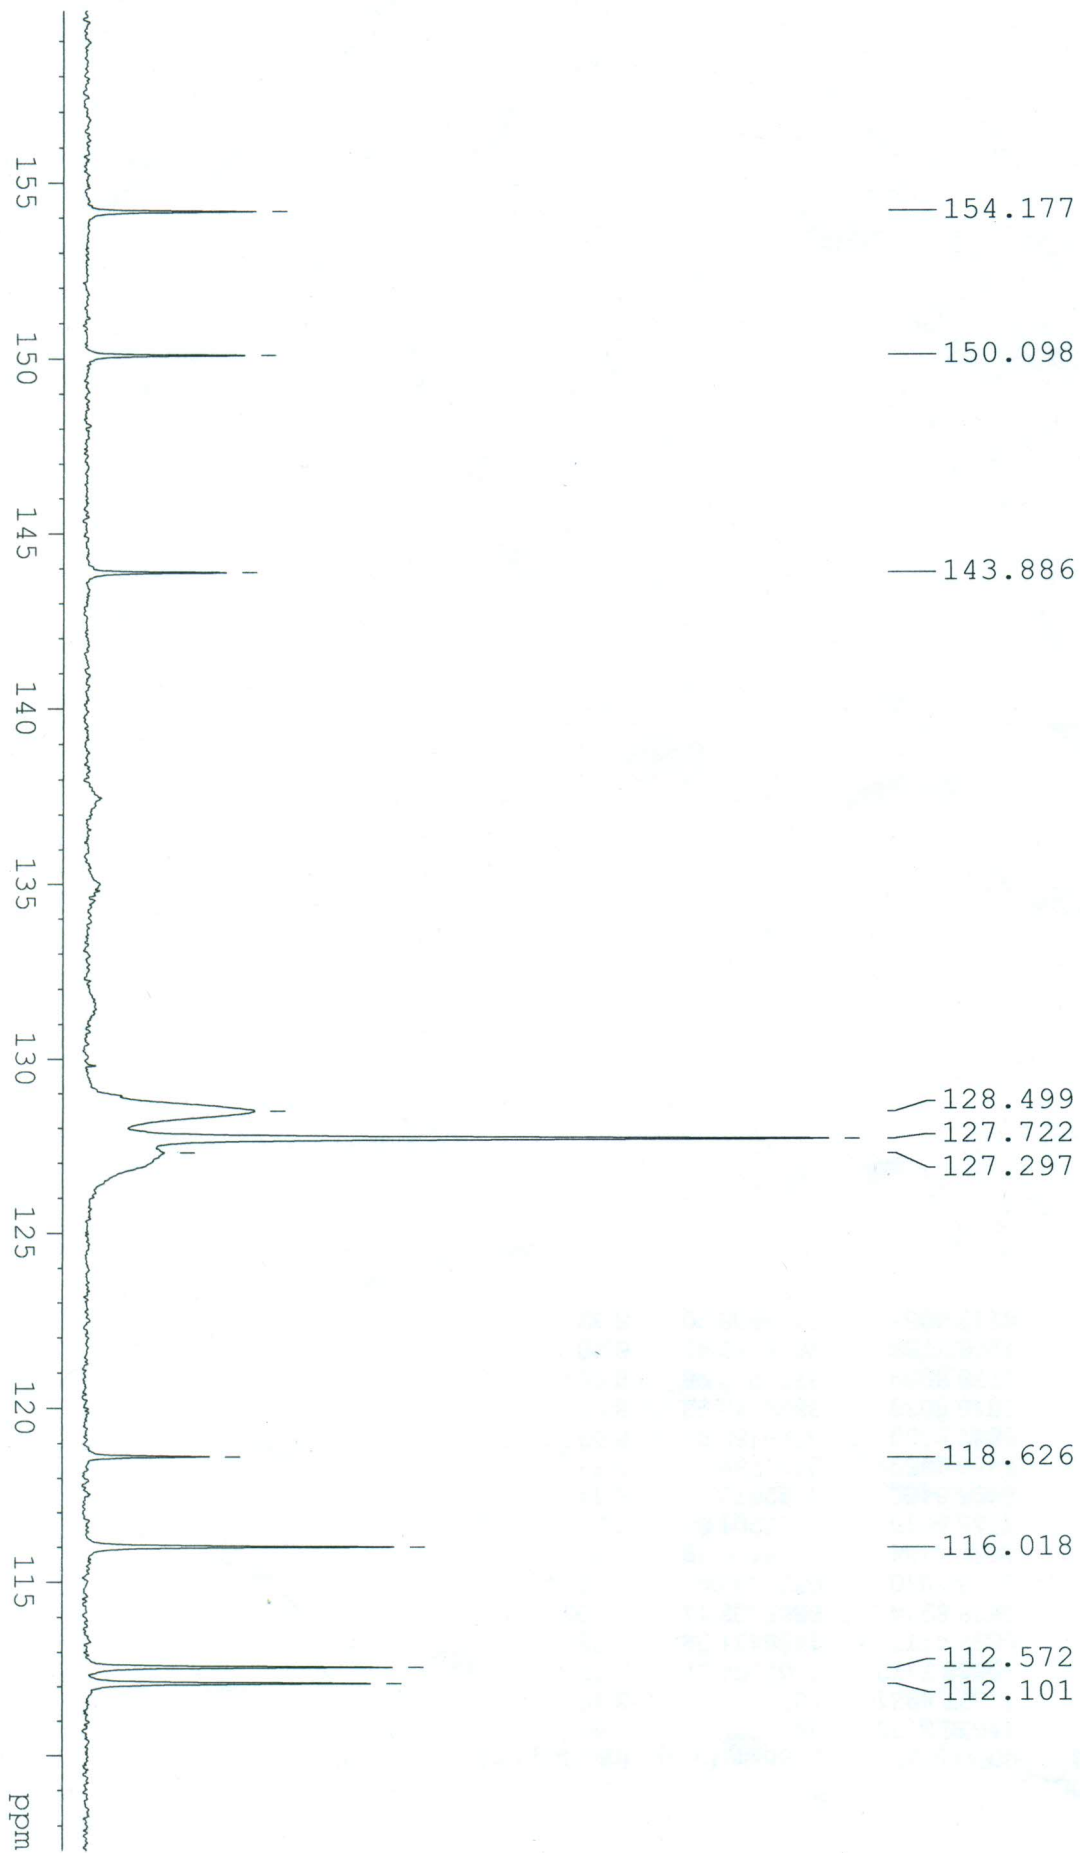

Supplement: Supplementary file 9 [file 3]

R.NO-23102

R9

$^{13}\text{C}$  IN  $\text{CDCl}_3$

AVANCE-300

*Handwritten signature*

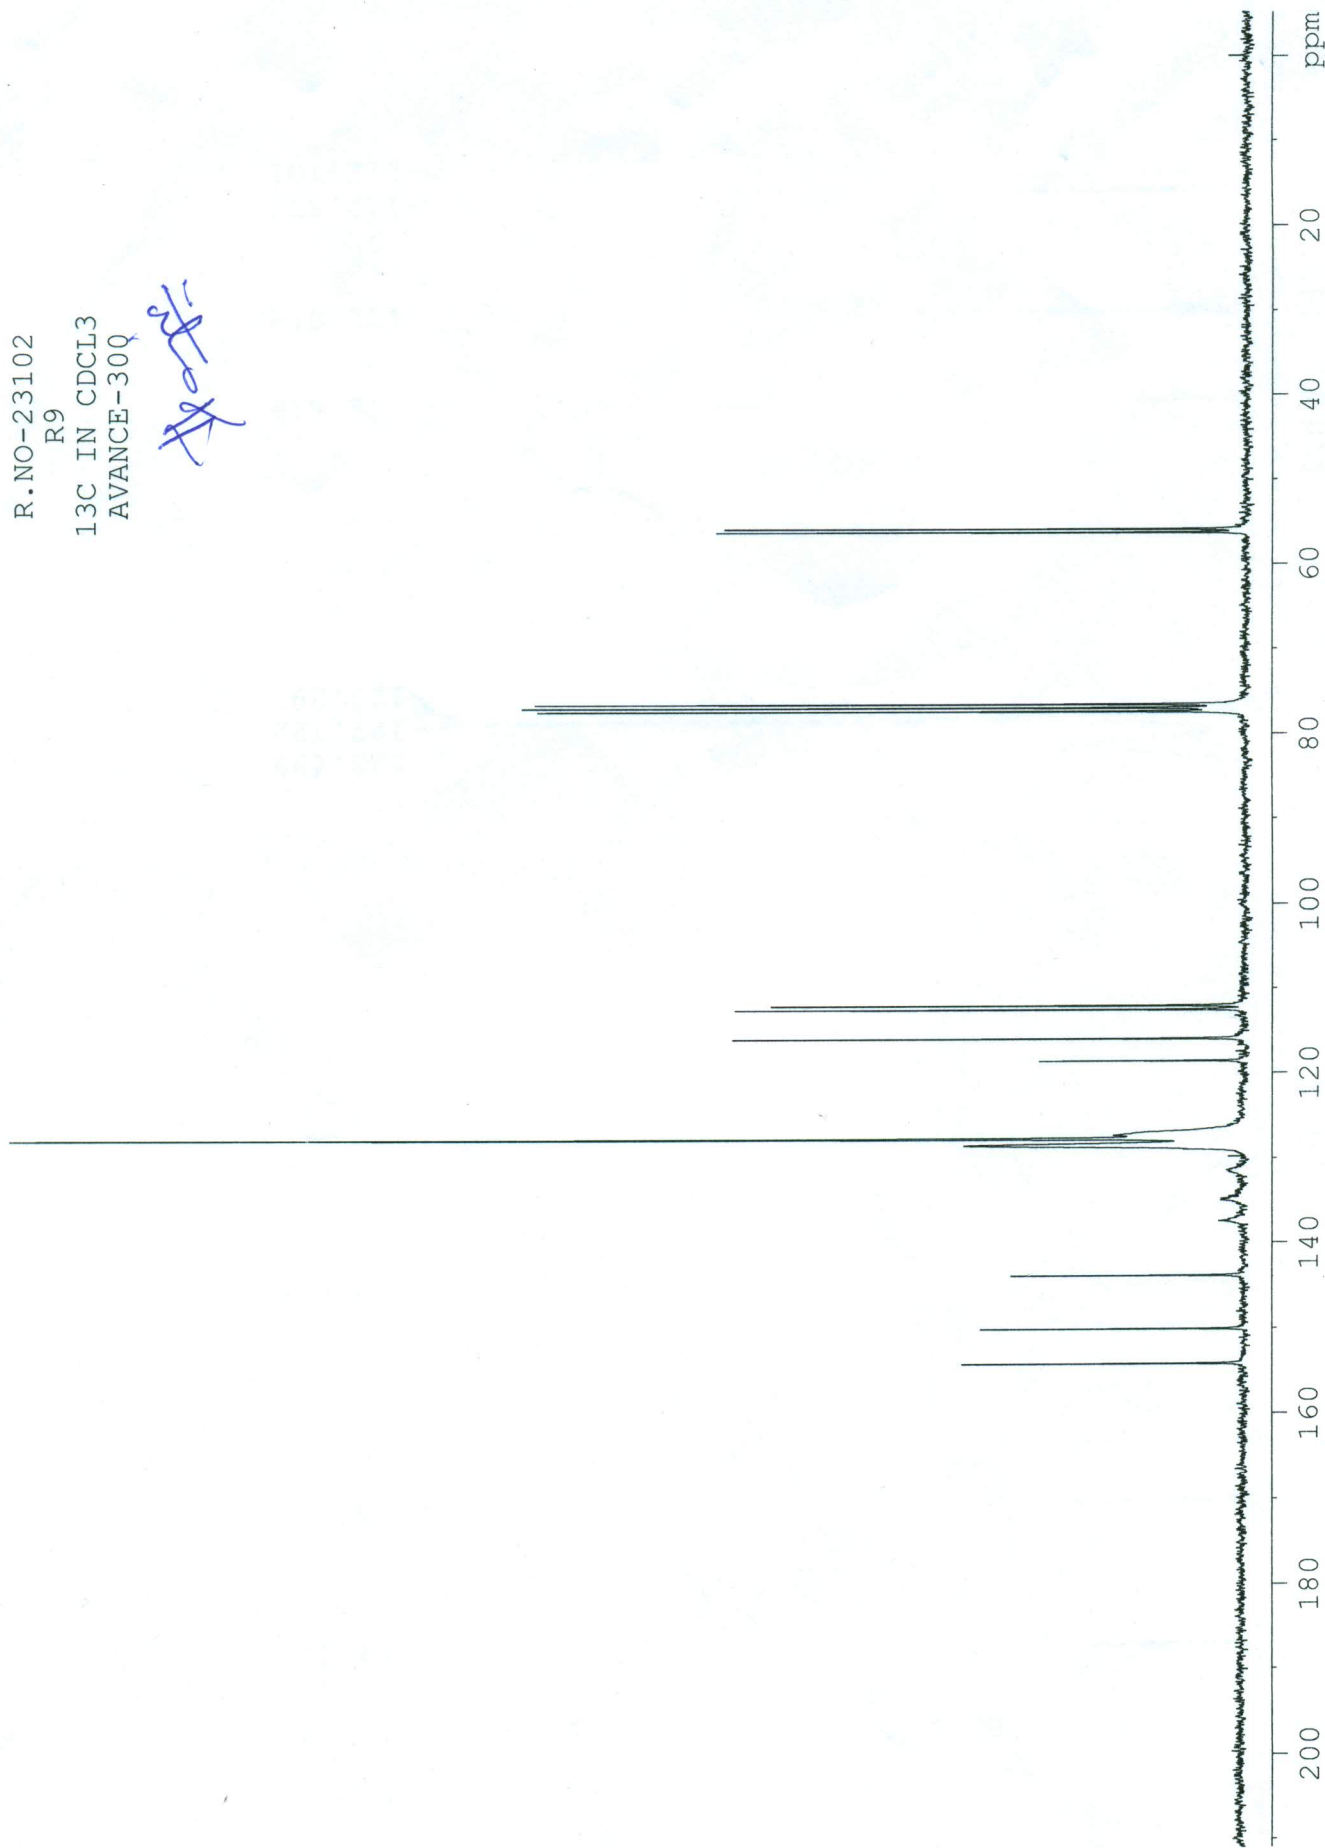

Supplement: Supplementary file 11 [file 3]

R.NO. 22849  
R-2  
1H IN DMSO  
AVANCE-300

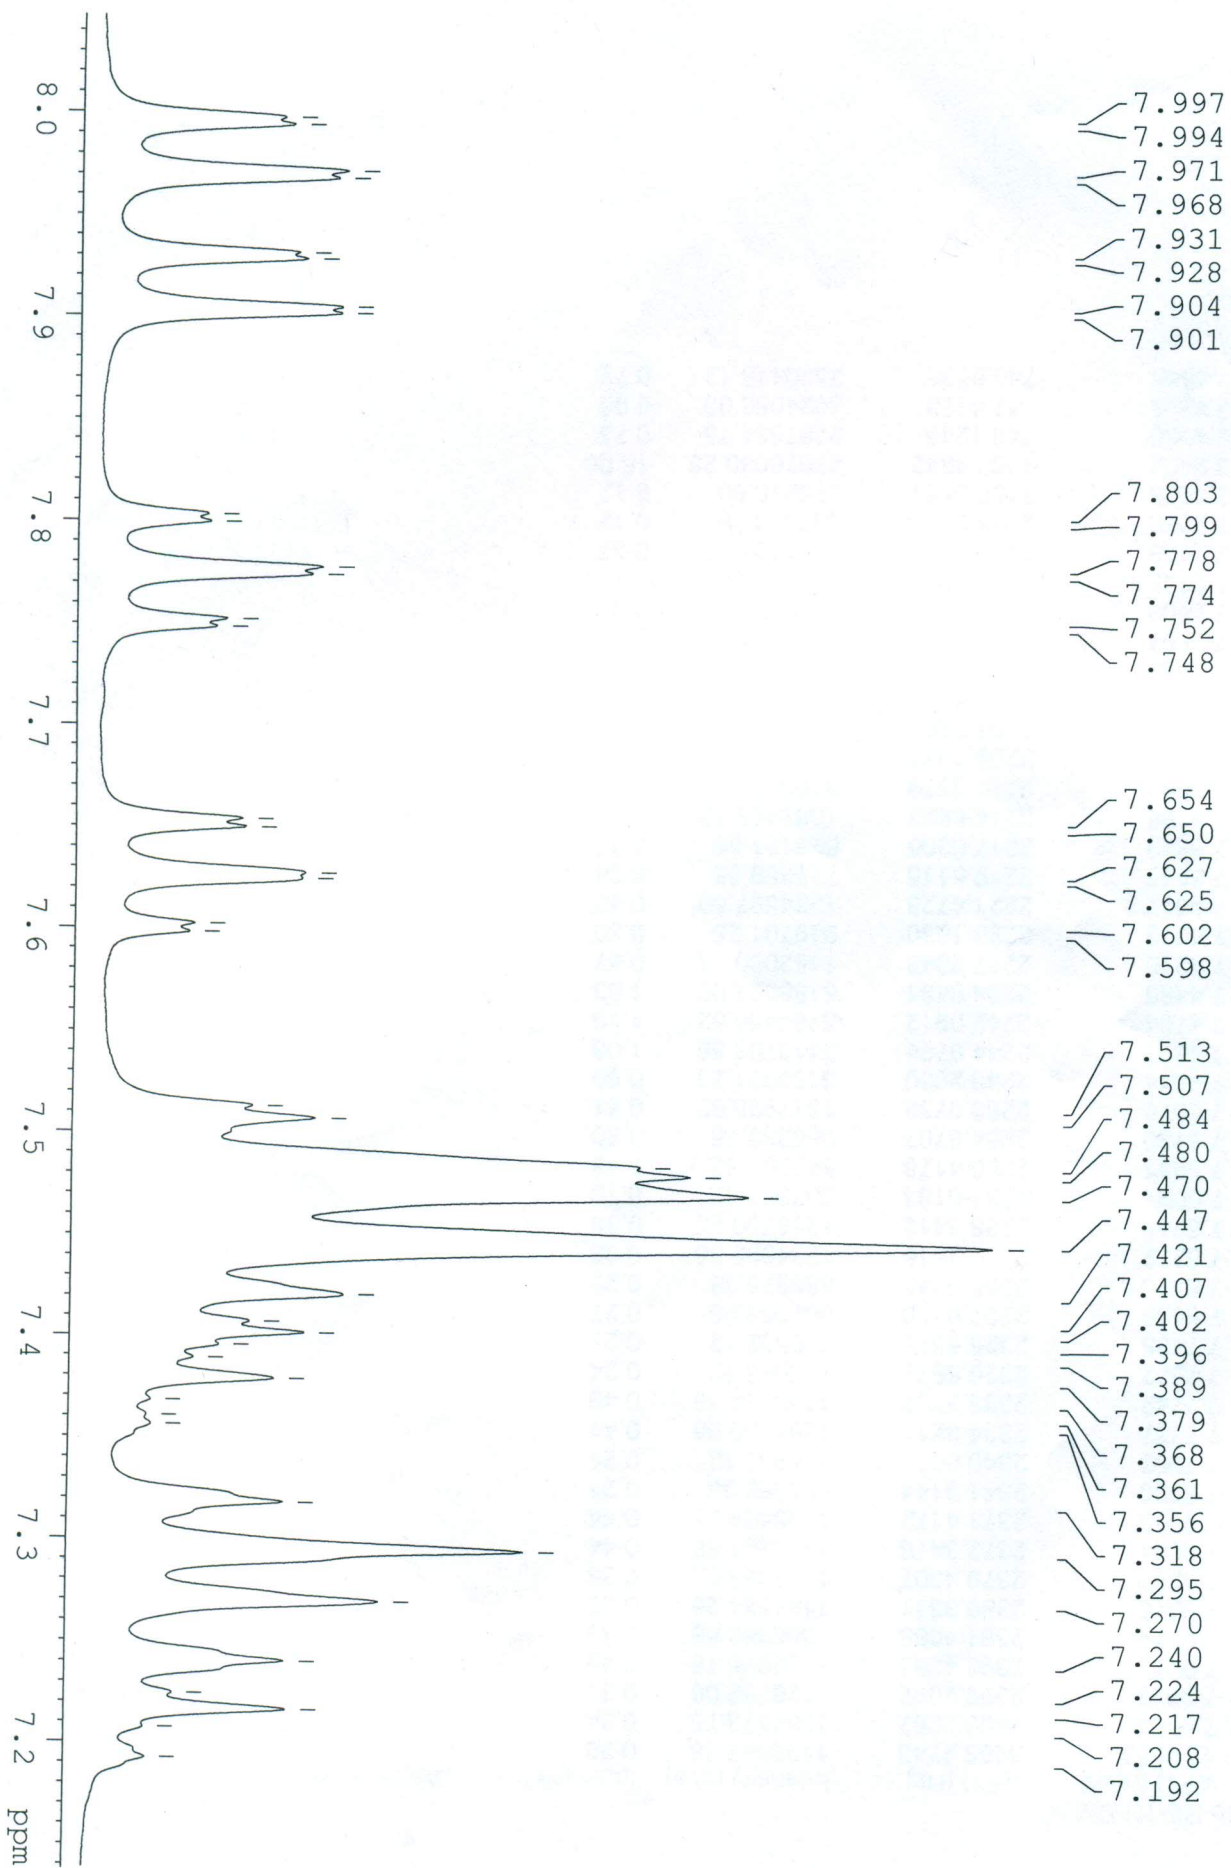

Supplement: Supplementary file 12 [file 3]
